# Supplementary material for: Exploration of Emerging Adult Virgins’ Difficulties
Source: PubMed Central journal article supplement — Emerg Adulthood. 2022 Jan 20;11(1):121–32. doi: 10.1177/21676968211064109 (PMC9841819; doi:10.1177/21676968211064109), 2022-01-20
Supplement: sj-pdf-1-eax-10.1177_21676968211064109.pdf [file sj-pdf-1-eax-10.1177_21676968211064109.pdf]

# INTERVIEW CANVAS

---

## **Before beginning the interview**

- Introduce the participant to the subject of the study and the interview process (present the objectives and procedure).
- Read the research presentation and answer the participant's questions.
- Read the consent form.
- Remind the participant that he/she can pause or terminate the interview or recording, or withdraw from the study at any time without prejudice.
- Have the participant sign the consent form.
- Have the participant complete the questionnaire.
- Administer the interview afterwards.

## **Opening questions**

Question 1: During the interview, several topics will be discussed, and some may be more sensitive. Feel free to name it if you prefer not to answer any of these questions. To begin, I would like to know how you heard about DiverJe research?

Question 2: What were your first thoughts when you heard that there was a research project focusing on adult virginity?

- Motivations

Question 3: What are your expectations?

Question 4: Do you have any fears?

- If so, what are they?

---

## **Theme 1: General life situation**

Question 5: To get to know you a little bit, can you tell me about yourself? Who you are, what you like, what you spend your time on?

Question 6: What are your interests, activities, hobbies?

- Lifestyle
- Work and school

Question 7: Do you share a home or house with others?

- Who?

## **Theme 2: Peer and Family Experiences and Relationships**

Question 8: Now I'd like to ask you about your past and current relationships with your peers and family. Can you tell me about it?

Question 9: How would you describe your relationships with your family?

- Could you describe to me the type of sex education received in your family?
- What values were passed on by your parents?
- What messages did your parents give you about sex?
- Today, do you talk about sex with any of the people in your family? Who do you talk to?
- Does your family know about your virginity?

Question 10: Tell me about your social life.

- Close friends? Men? Female?

Question 11: How would you describe your relationships with women?

Question 12: How would you describe your relationships with men?

Question 13: Before moving on to the next section of the interview, is there anything else you would like to add about your relationships with your family and peers?

## **Theme 3: Sexual and Love Experiences and Relationships**

Intro: Now I'd like to ask you some questions about your intimate life.

Question 14: Can you tell me about your and your friends' sex lives as teenagers?

- Peer sexual activities
- Attitudes about sex
- Other virgins your age
- Are there others in your network who have not yet had sex?

Question 15: Have you ever had any sexual or romantic experiences?

If yes, please tell us

- How would you describe them?
- Have you had feelings of love for someone?
- What types of sexual and romantic experiences have you had?
- What intimacy behaviors did you engage in?
- Did you talk about your feelings?
- Did you mention that you are a virgin?
- How did you do this?
- What were their reactions?
- How did you feel?

Question 16: Have you ever felt sexual desire towards someone?

- Have you ever felt desired by a person?

Question 17: So far, we have talked about your sexual and love history. We are also interested in knowing how our participants perceive seduction. Have you ever tried to seduce?

If so, please tell us

- How do you go about seducing a man/woman?
- How does it normally go?
- How do you perceive your seduction skills?

If no, please tell us

- Why not?
- Have you ever felt that someone was trying to seduce you?

Question 18: Before moving on to the next section of the interview, is there anything else you would like to add about seduction or your experiences with love and sex?

#### **Theme 4: Virginity, identity, and disclosure**

Question 19: Now I'd like to hear about your virginity. Can you tell me about it?

Question 20: In your own words, how do you define virginity?

- Representations of virginity

**Question 21: How do you feel about your virginity?**

- **Feelings toward virginity can sometimes be colored by social representations. If there were no such representations, how would you feel about your virginity?**

Question 22: Do you feel that your virginity influences how you perceive yourself as a man or a woman?

If yes

- How?

Question 23: What positive aspects do you see in being a virgin?

**Question 24: What negative aspects do you see about being a virgin?**

Question 25: If we go back in time, would you say that your experience or perceptions of your virginity have changed at different times in your life?

If so, how has it changed?

- Mid-teens (ages 15-16)
- Late adolescence (17-18 years old)
- Early adulthood (19-20 years)
- Now

Question 26: Have you ever wanted to lose your virginity?

If yes, please tell us

- Have you ever taken steps to do so? Which ones?

Question 27: Some participants mentioned using strategies to cope with their virginity or to control the contexts and people to whom they disclose it. Have you developed such strategies yourself?

If yes, please tell us

- Which ones?

Question 28: Do you talk openly about your virginity to others?

If yes, please tell us

- In what contexts?
- To whom?

Question 29: Can you tell me about a time when you told someone else that you were a virgin? (friends, acquaintance)

- How did it happen?
- How was it received?
- How did you feel?

Question 30: Are there any contexts in which you prefer not to disclose your virginity?

If yes, please tell us

- Identity of the people
- How do you avoid talking about your virginity?
- Can you tell me about a time when you chose to avoid disclosing to someone that you were a virgin when sexuality or virginity was discussed?

Question 31: Before moving on to the next section of the interview, is there anything else you would like to add about disclosing your virginity?

### **Theme 5: Social representations of virginity**

Question 32: Have you ever heard people your age talk about late virginity?

If yes, please tell us

- Do you have any examples?
- Can you tell me what you perceived? (Context, people, message, etc.)

Question 33: How do you think virgin adults are perceived?

- Are there differences in perceptions between male and female adult virgins?

**Question 34: What challenges do you think virgin adults face?**

- **What challenges have you experienced yourself as a virgin adult?**

**Question 35: Several participants we interviewed told us about the stigma they feel related to their virginity. How does this relate to your experience or not? Can you tell me about it?**

- **Why do you think there is a stigma associated with being a late virgin?**
- **Where do you think these perceptions/stigma come from?**
- **Do you have any other thoughts to share with me about this?**

Question 36: Do you recall seeing people (fictional or real, such as public figures) publicly reveal their late virginity?

If yes, please tell us

- Describe this memory to me.
- What impacts do you think these disclosures have?
- How are adult virgins portrayed in the media?
- Do you or do you not identify with some of their characteristics?

Question 37: Before moving on to the next section of the interview, is there anything else you would like to add regarding social representations of virginity?

### **Theme 6: Self-perception and body image**

Intro: Now I'd like to talk about your self-perception.

Question 38: How would you describe yourself?

Question 39: What are your qualities, your strengths?

Question 40: What do you think about your body?

- Can you tell me about your perception of your body/face/appearance?
- Are you satisfied with your appearance? What do you like about it?
- What would you like to change?

Question 41: Now I'd like us to discuss your puberty. How did it go for you?

Question 42: Before we move on to the next section of the interview, is there anything else you would like to add about your perception of yourself?

### **Theme 7: Internet Use and Support**

Intro: Finally, I would like to ask you some questions related to your use of the Internet in relation to your virginity.

Question 43: Do you use or have you ever used mobile apps or dating sites?

If yes, please tell us

- Tell me about your experience.

Question 44: What role(s) does the Internet play in your virgin experience?

- Information about sexuality
- Social support
- Use of forums

- Pornography
- If relevant: What type of pornography do you use?

Question 45: Some of the participants we interviewed told us about the place of masturbation in their lives. For you, what place does masturbation take in your life?

**Question 46: Have you ever gone to a professional for support or listening related to your virginity?**

**If yes, please tell us**

- **In what context?**
- **What was your experience like?**
- **Did you have a preference for consulting a female or male professional? Why?**

**If no, please tell us**

- **Why not?**
- **Have you ever felt the need for support or listening in relation to your virginity?**

Question 47: If you had to intervene or a design a sexuality education program that addresses adult virginity, what would you suggest?

- Topics
- Needs
- Targets
- Mixed-gender group
- Messages to avoid
- Messages to convey

### **To end the interview**

- Ask the participant if there are any positive aspects of virginity that we have not discussed.
- Ask the participant if he or she has anything to add.
- Ask the participant how he/she felt during the interview, if he/she thought the questions were relevant (and if not, how he/she suggests we rephrase it).
- Ask the participant if they know of any other male/female virgins who might be interested in participating.
- Ask if they can be contacted again for future phases of the project.
- Invite them to write to us if they want to add anything further to the interview.
- Ask if they would like us to call them back in the next week to give them the opportunity to share what this interview may have awakened in them afterwards.
- Ask if they would like us to send them the results of the study (if so, take their email address).
